# Supplementary material for: Ni(ii) and Pd(ii) pyridinyloxazolidine-compounds: synthesis, X-ray characterisation and catalytic activities in the aza-Michael reaction
Source: Royal Society of Chemistry journal article supplement (doi:10.1039/c1dt11191d), 2011-11-11

*Electronic Supplementary Information*

## **Ni(II) and Pd(II) pyridinyloxazolidine-compounds: synthesis, X-ray characterisation and catalytic activities in the aza-Michael reaction**

G. Attilio Ardizzioia, Stefano Brenna,\* and Bruno Therrien

### **Table of contents**

|                        |                                                                                                                                                           |
|------------------------|-----------------------------------------------------------------------------------------------------------------------------------------------------------|
| <b># Figs. S1-S3</b>   | <sup>1</sup> H and <sup>13</sup> C NMR spectra of ligand <b>ppo</b>                                                                                       |
| <b># Figs. S4-S6</b>   | <sup>1</sup> H and <sup>13</sup> C NMR spectra of complex <b>1</b>                                                                                        |
| <b># Fig. S7</b>       | <sup>1</sup> H NMR spectrum (CD <sub>2</sub> Cl <sub>2</sub> , RT) of complex <b>2</b>                                                                    |
| <b># Figs. S8-S11</b>  | Magnetic moment measurements conducted on compound <b>2</b> via <sup>1</sup> H NMR solution at different temperatures, in CD <sub>2</sub> Cl <sub>2</sub> |
| <b># Figs. S12-S15</b> | Magnetic moment measurements conducted on compound <b>2</b> via <sup>1</sup> H NMR solution at different temperatures, in CD <sub>3</sub> OD              |
| <b># Fig. S16</b>      | Absolute energy of the five possible isomers of [Ni( <b>ppo</b> ) <sub>2</sub> Cl <sub>2</sub> ]                                                          |
| <b># Figs. S17-S19</b> | Mass spectra of the products of aza-Michael reactions                                                                                                     |

**Fig. S1.**  $^1\text{H}$  NMR ( $\text{CDCl}_3$ , 298 K) of ligand **ppo**

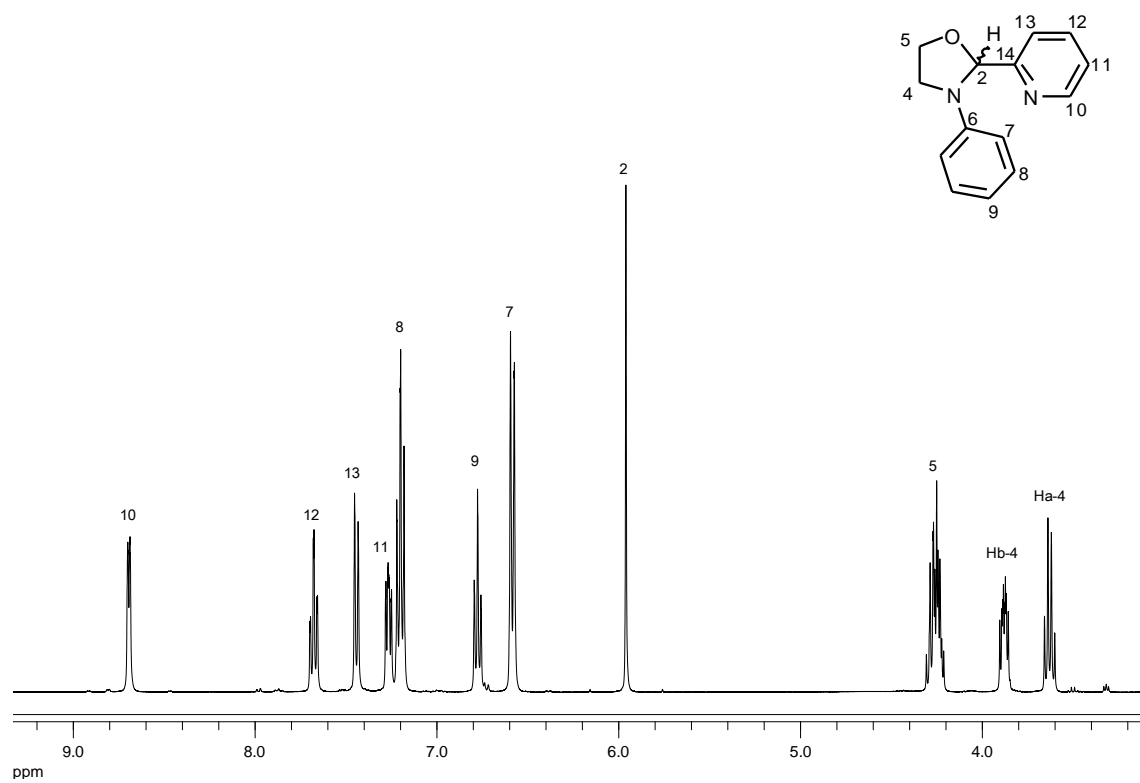

**Fig. S2.**  $^{13}\text{C}$  NMR ( $\text{CDCl}_3$ , 298 K) of ligand **ppo**

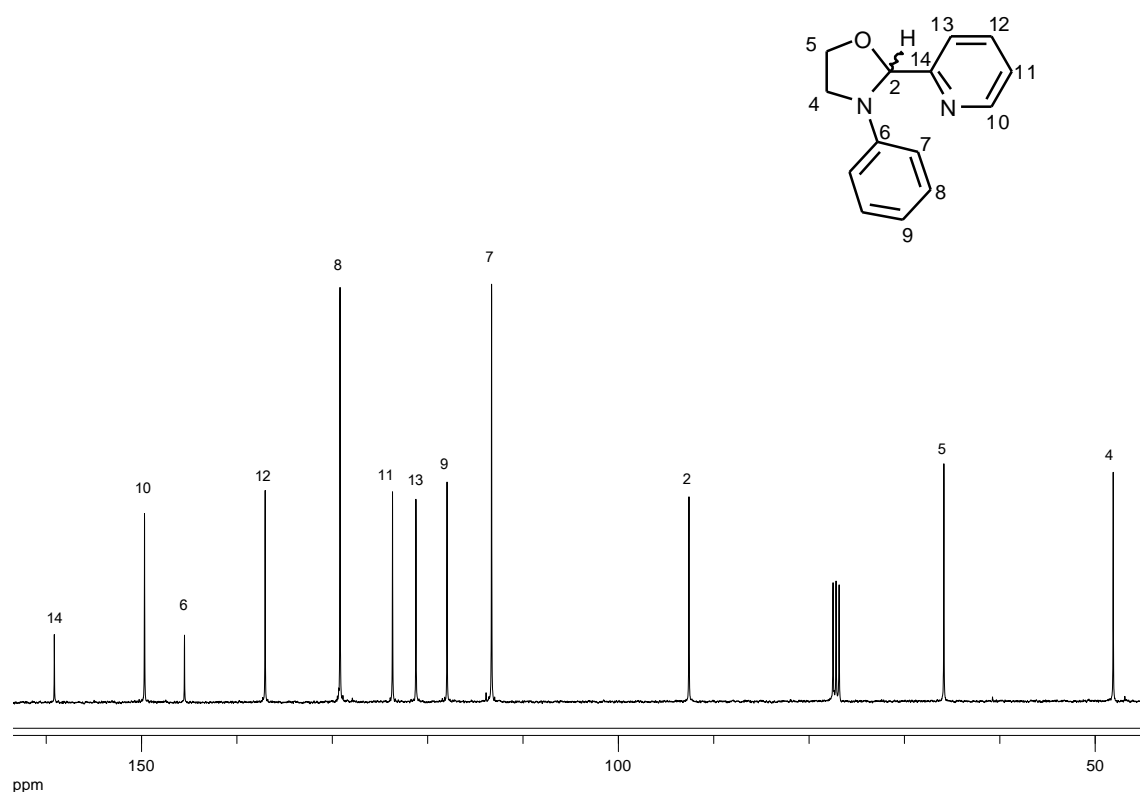

**Fig. S3.**  $^1\text{H}$ - $^{13}\text{C}$  HETCOR ( $\text{CDCl}_3$ , 298 K) of ligand **ppo**

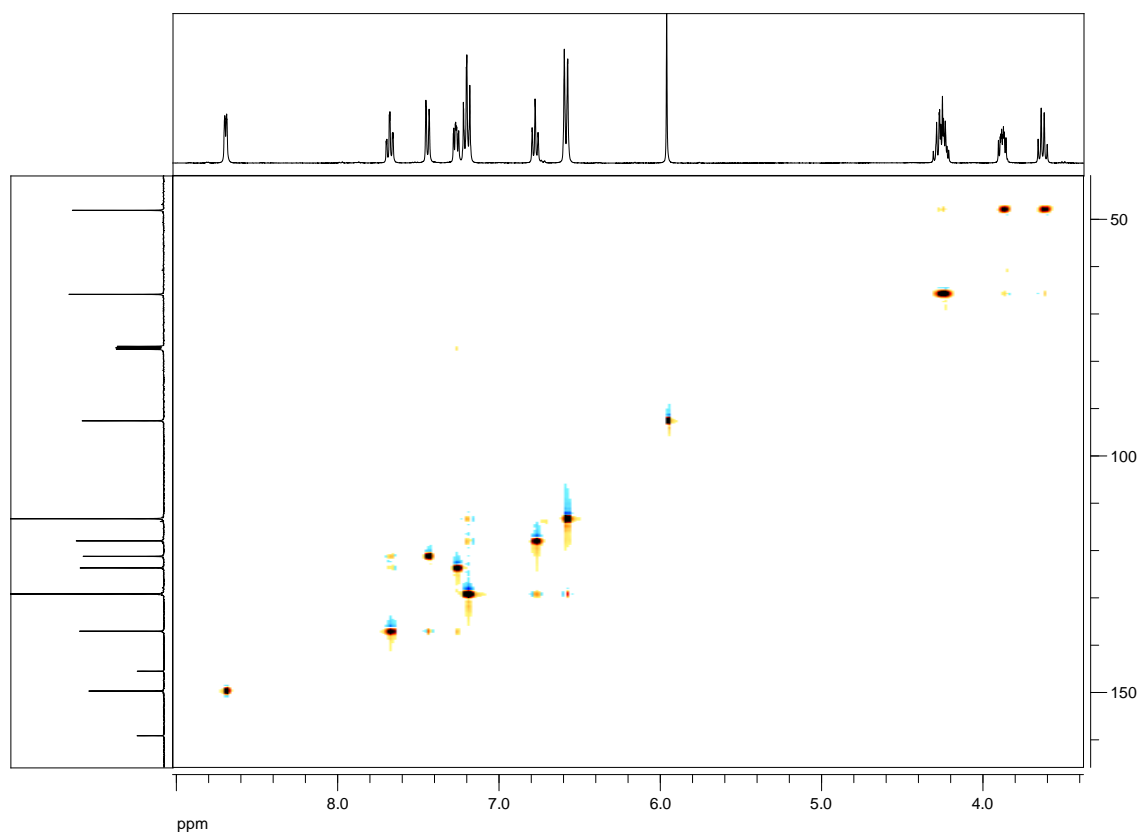

**Fig. S4.**  $^1\text{H}$  NMR ( $\text{CD}_3\text{CN}$ , 298 K) of complex  $[\text{Pd}(\text{N,N}'\text{-ppo})\text{Cl}_2]$  (**1**)

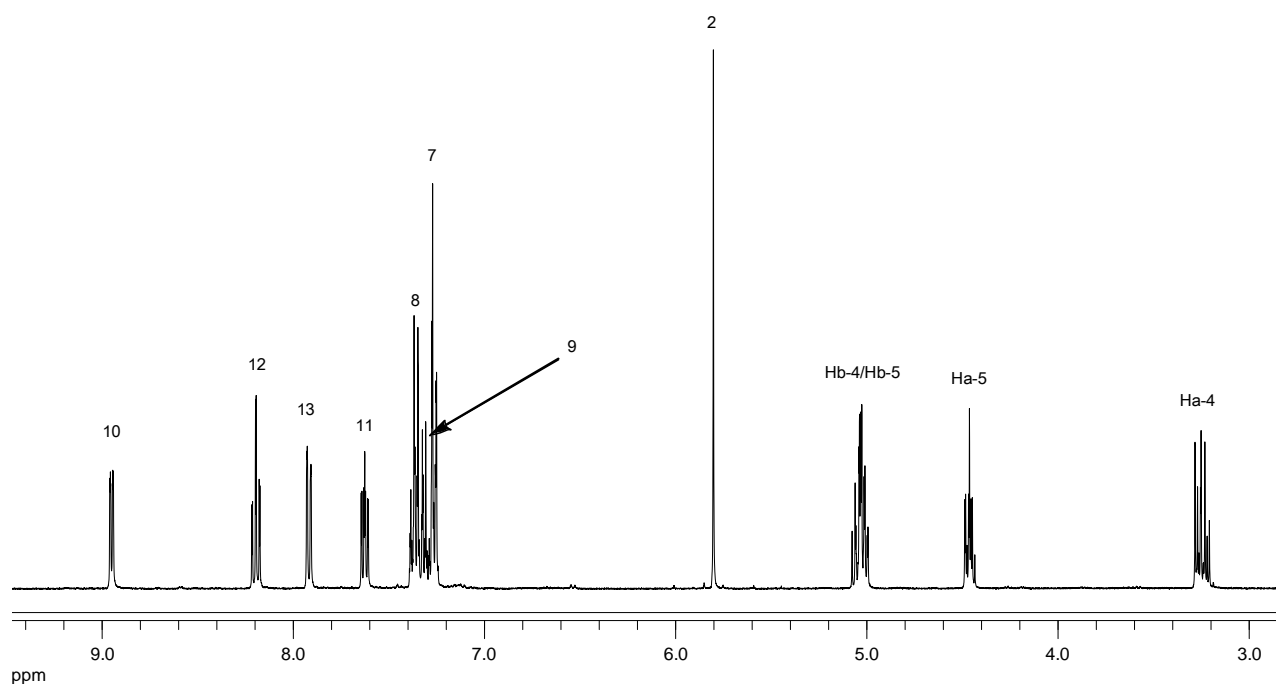

**Fig. S5.**  $^{13}\text{C}$  NMR ( $\text{CD}_3\text{CN}$ , 298 K) of complex  $[\text{Pd}(\text{N},\text{N}'\text{-ppo})\text{Cl}_2]$  (**1**)

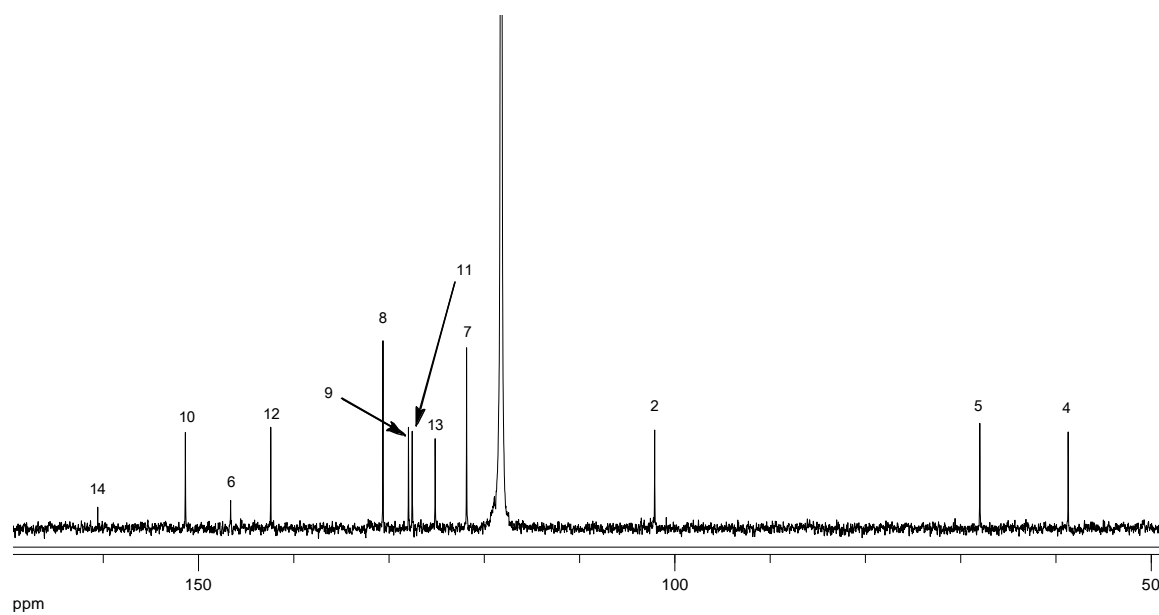

**Fig. S6.**  $^1\text{H}$ - $^{13}\text{C}$  HETCOR ( $\text{CD}_3\text{CN}$ , 298 K) of complex  $[\text{Pd}(\text{N},\text{N}'\text{-ppo})\text{Cl}_2]$  (**1**)

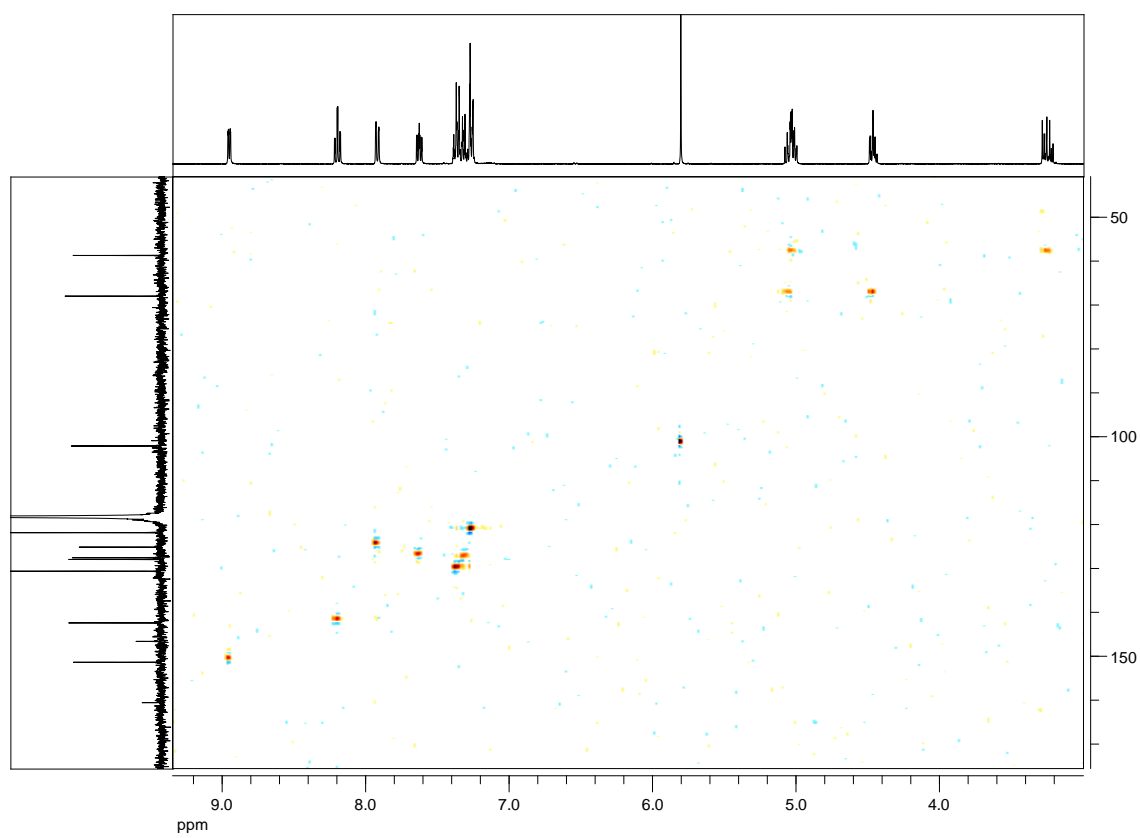

**Fig. S7.**  $^1\text{H}$  NMR ( $\text{CD}_2\text{Cl}_2$ , RT) of complex  $[\text{Ni}(\text{N},\text{O}\text{-ppo})_2\text{Cl}_2]$  (**2**)

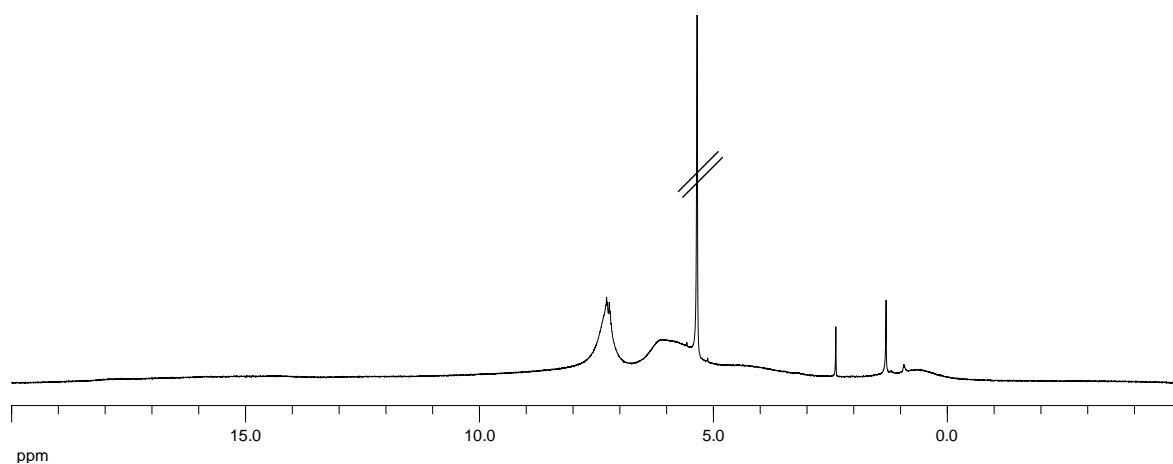

**Fig. S8.** Magnetic moment of compound **2** via  $^1\text{H}$  NMR (Evans' method), in  $\text{CD}_2\text{Cl}_2/\text{toluene}$ , at 298 K.

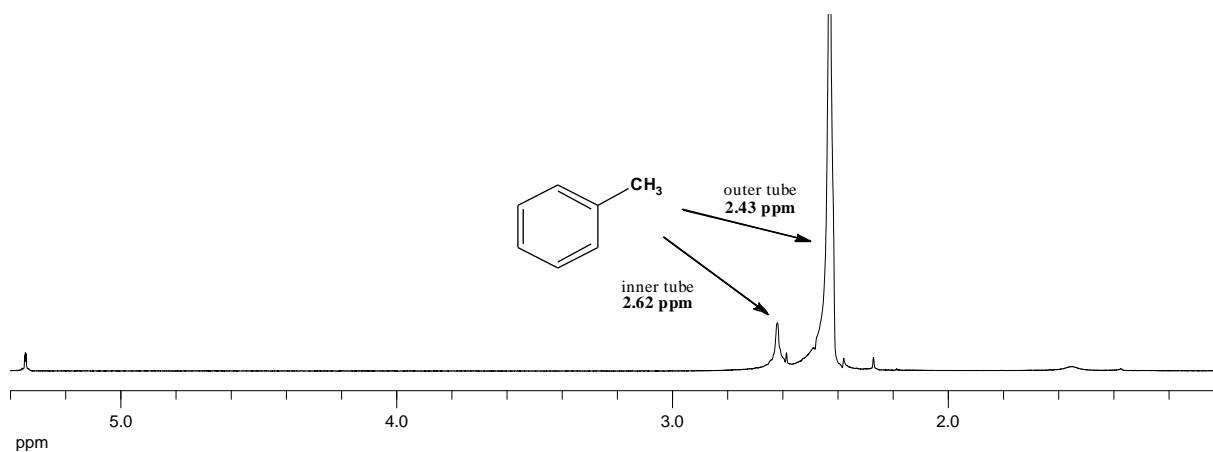

**Fig. S9.** Magnetic moment of compound **2** via  $^1\text{H}$  NMR (Evans' method), in  $\text{CD}_2\text{Cl}_2/\text{toluene}$ , at 273 K.

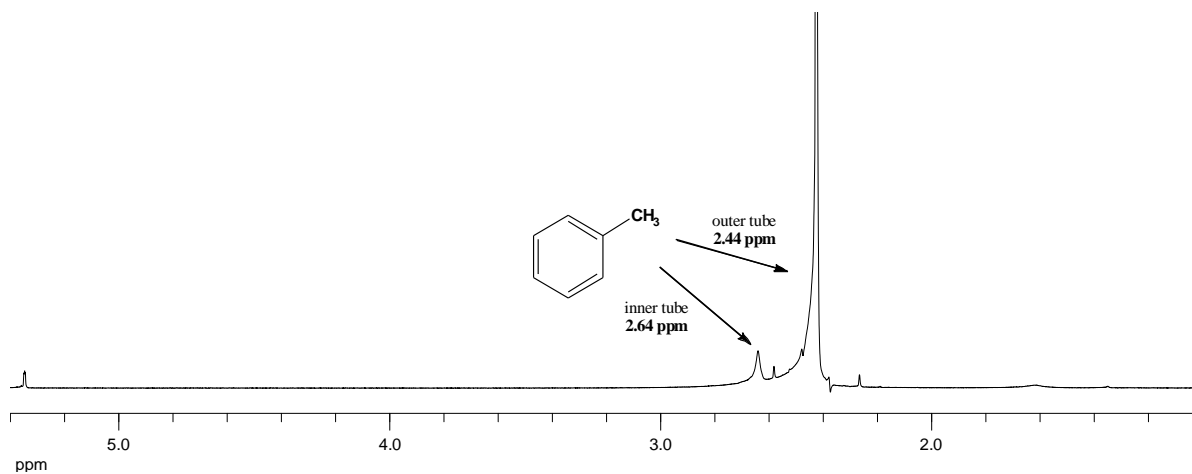

**Fig. S10.** Magnetic moment of compound **2** via  $^1\text{H}$  NMR (Evans' method), in  $\text{CD}_2\text{Cl}_2/\text{toluene}$ , at 228 K.

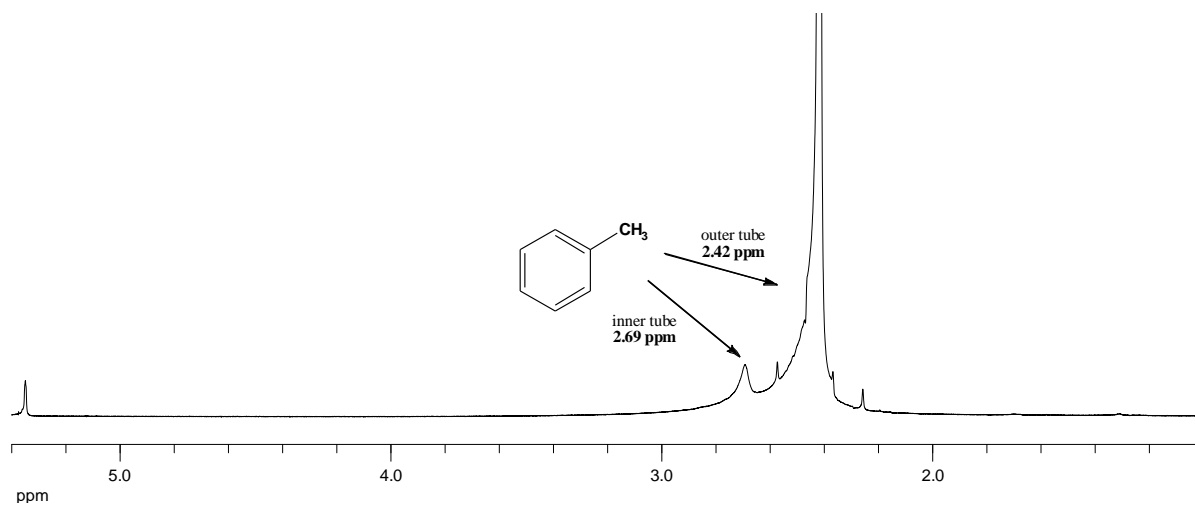

**Fig. S11.** Magnetic moment of compound **2** via  $^1\text{H}$  NMR (Evans' method), in  $\text{CD}_2\text{Cl}_2/\text{toluene}$ , at 308 K.

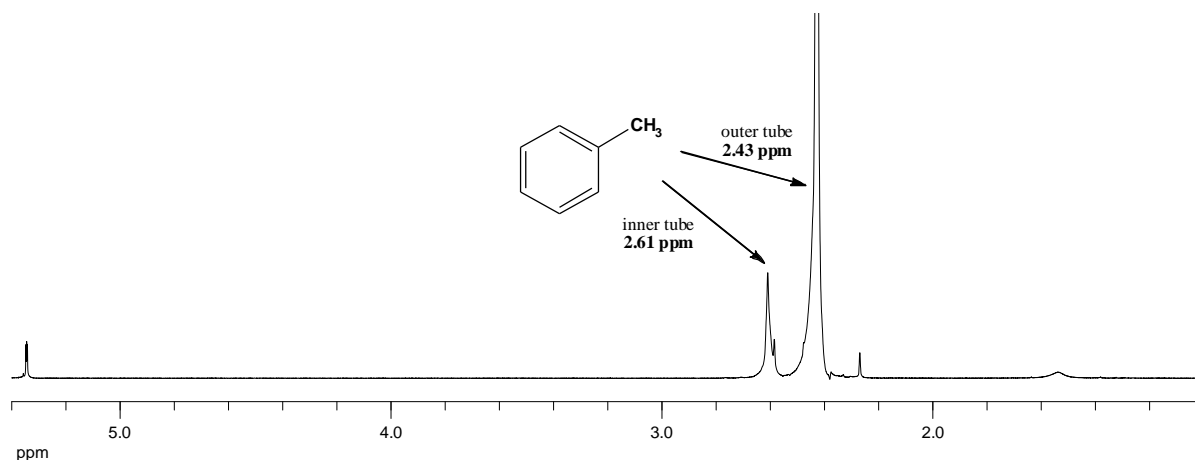

**Fig. S12.** Magnetic moment of compound **2** via  $^1\text{H}$  NMR (Evans' method), in  $\text{CD}_3\text{OD}$ /toluene, at 298 K.

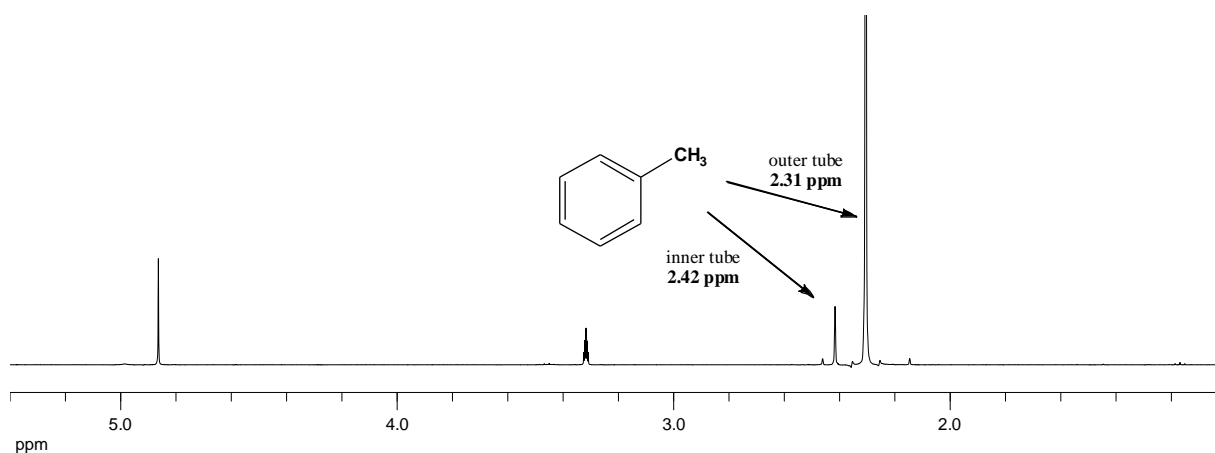

**Fig. S13.** Magnetic moment of compound **2** via  $^1\text{H}$  NMR (Evans' method), in  $\text{CD}_3\text{OD}$ /toluene, at 273 K.

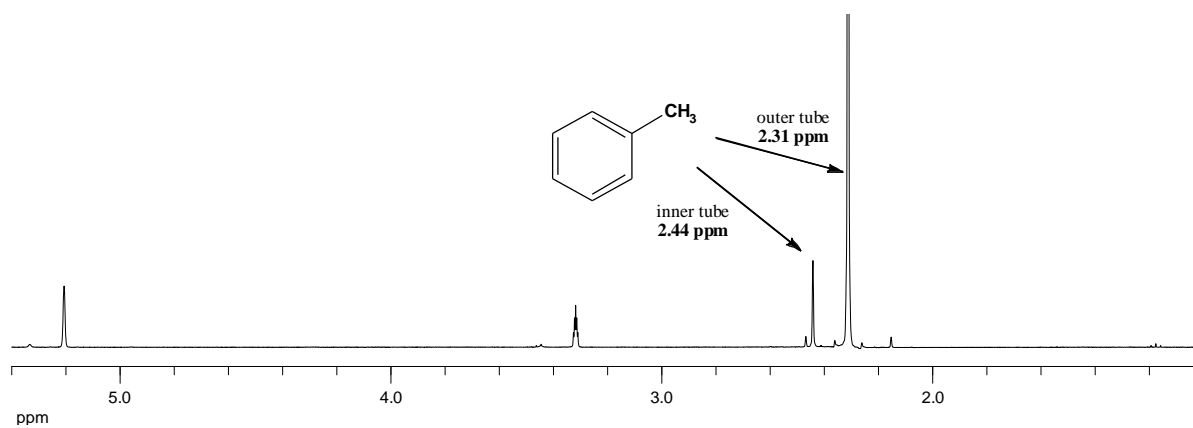

**Fig. S14.** Magnetic moment of compound **2** via  $^1\text{H}$  NMR (Evans' method), in  $\text{CD}_3\text{OD}$ /toluene, at 228 K.

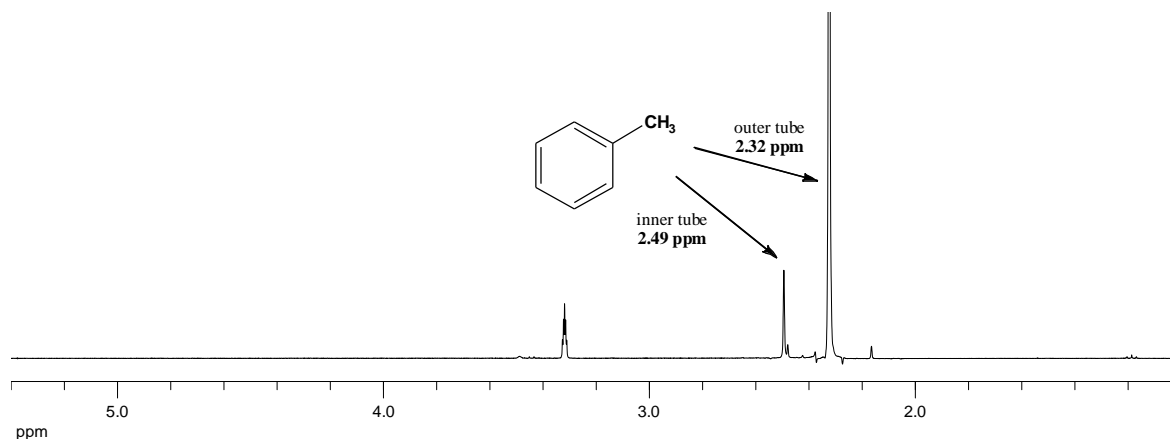

**Fig. S15.** Magnetic moment of compound **2** via  $^1\text{H}$  NMR (Evans' method), in  $\text{CD}_3\text{OD}/\text{toluene}$ , at 308 K.

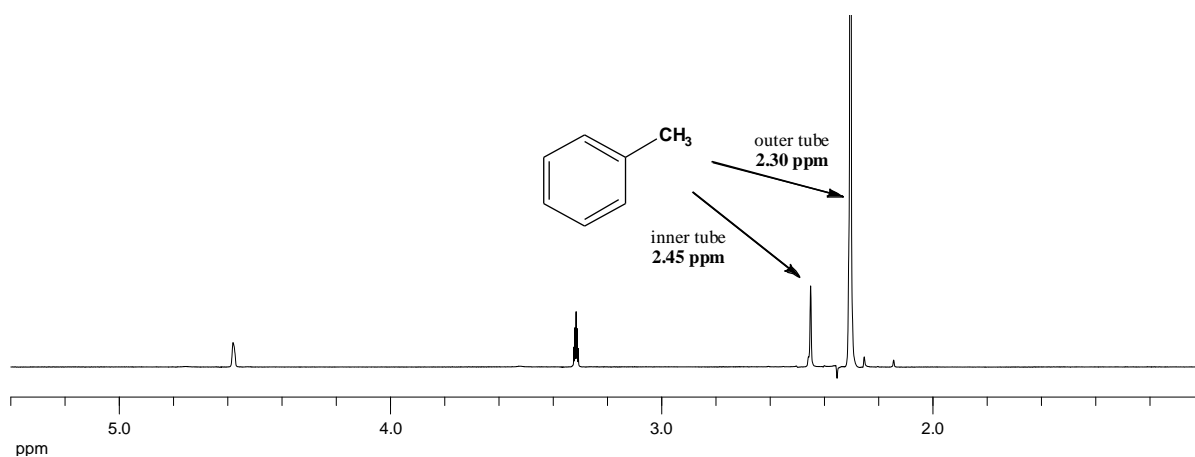

**Fig. S16.** Absolute energy of the five possible isomers of  $[\text{Ni}(\text{ppo})_2\text{Cl}_2]$ . ( $\text{ttt}-[\text{Ni}(\text{ppo})_2\text{Cl}_2]$  opt: *complex 2* optimized in vacuum or acetonitrile )

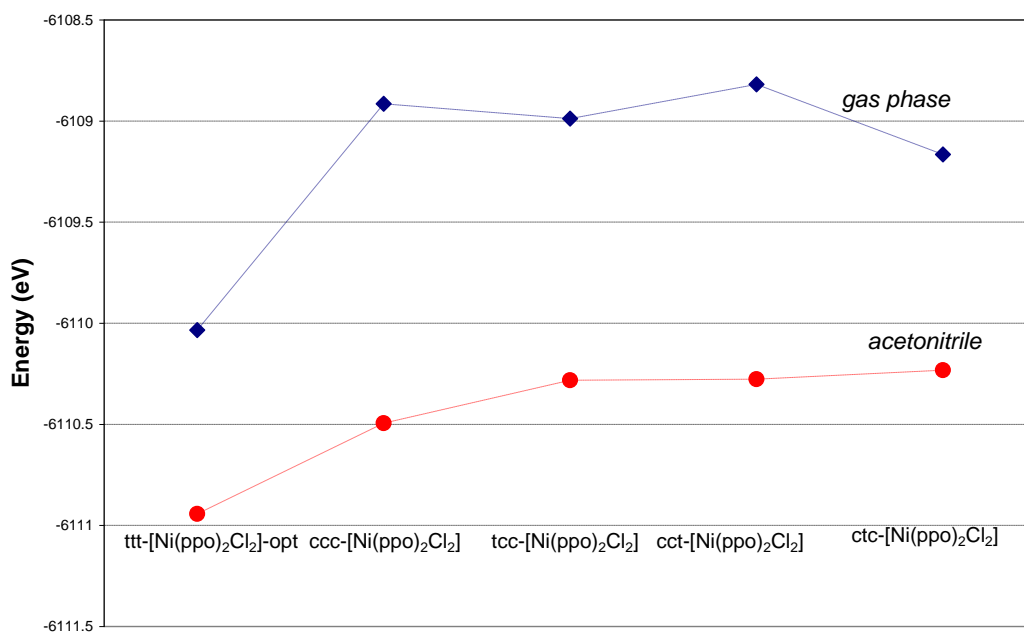



**Fig. S17.** Conjugate addition of piperidine to benzalacetone catalysed by complexes **1** and **2**: mass spectrum of the product (calc. for  $M^+$ :  $m/z = 231.16$ ).

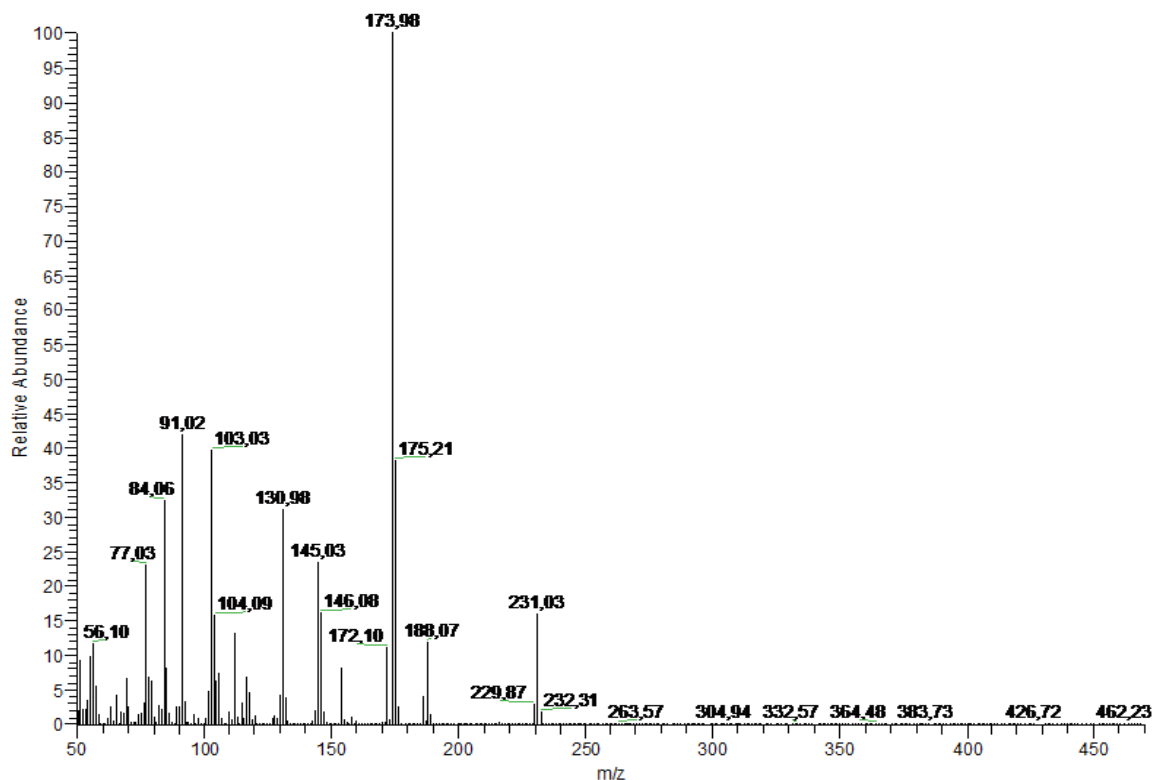

**Fig. S18.** Conjugate addition of morpholine to benzalacetone catalysed by complexes **1** and **2**: mass spectrum of the product (calc. for  $M^+$ :  $m/z = 233.14$ ).

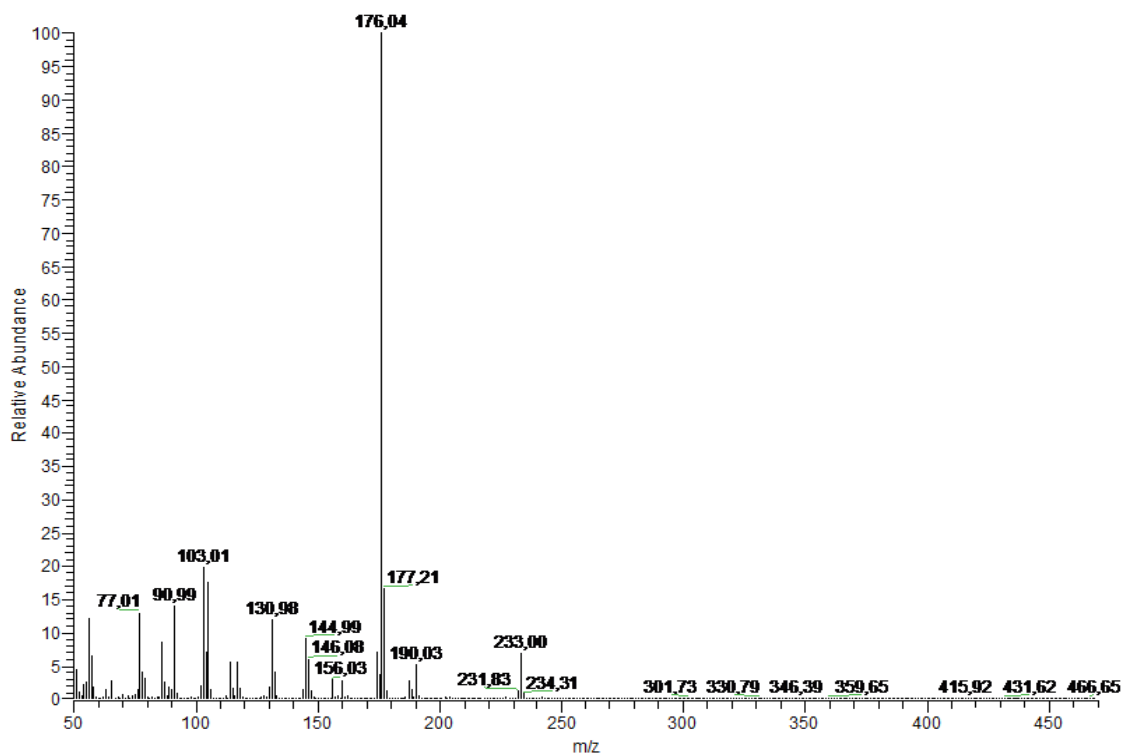

**Fig. S19.** Conjugate addition of dimethylamine to benzalacetone catalysed by complexes **1** and **2**: mass spectrum of the product (calc. for  $M^+$ :  $m/z = 191.13$ ).

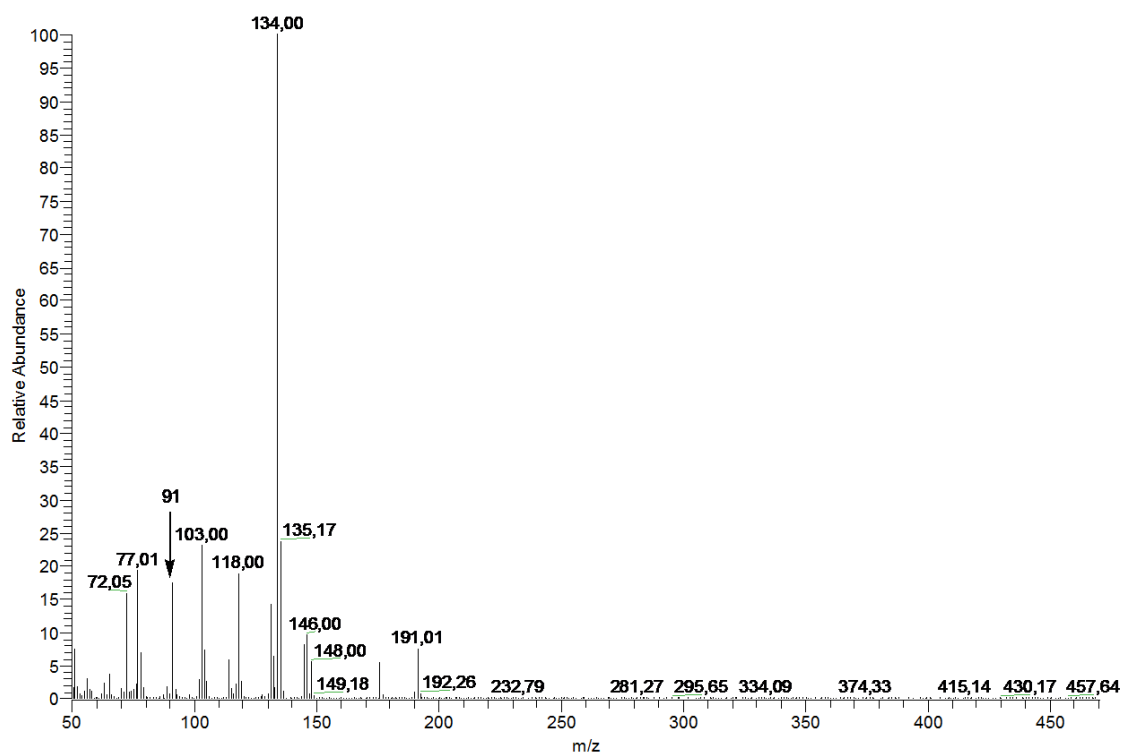

Supplement: c1dt11191d.pdf [file c1dt11191d.pdf]
